# Supplementary material for: Melatonin reverses nasopharyngeal carcinoma cisplatin chemoresistance by inhibiting the Wnt/β-catenin signaling pathway
Source: publisher site journal article supplement (doi:10.18632/aging.102968), 2020-03-23
Supplement: Supplementary file [file aging-v12i6-102968-supplementary-material-SD1.pdf]

SUPPLEMENTARY FIGURES

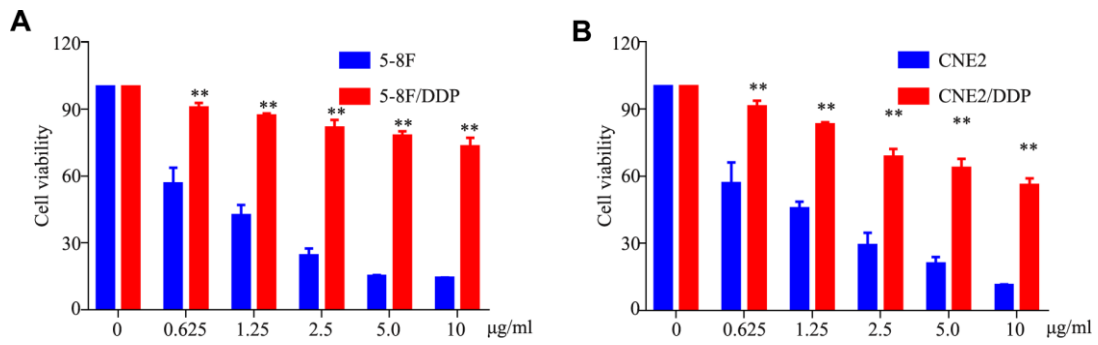

Supplementary Figure 1. Establishment of cisplatin-resistant NPC cells. (A, B) CCK8 assay was conducted in parental and 5-8F/DDP (A) and CNE2/DDP (B) cells.

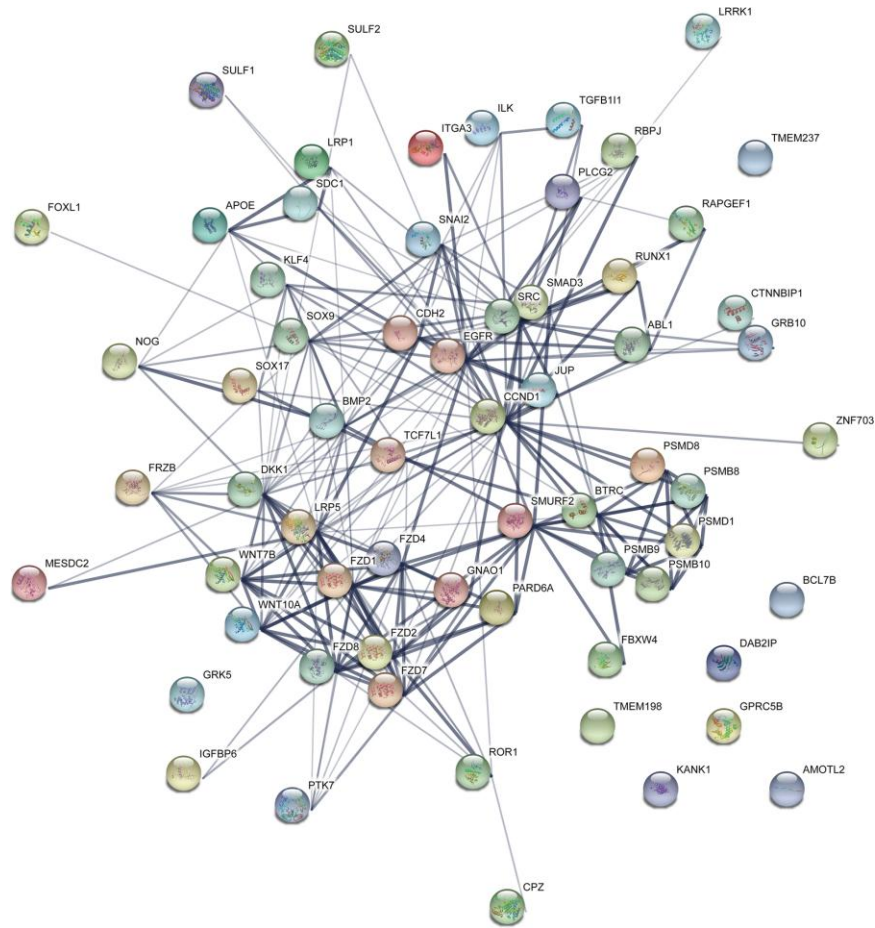

Supplementary Figure 2. Hub genes in the Wnt/ $\beta$ -catenin signaling pathway.
